# Supplementary material for: Danshensu IIA Inhibits Liver Cancer Progression: Mechanism Based on the MAPK/NF-κB Signaling Pathway
Source: Research Square preprint supplement (doi:10.21203/rs.3.rs-7928827/v1), 2025-11-06
Supplement: Supplementary file 1 [file 55225ee28dbd6b740fd2ddd0.docx]

**Table S1**

| Gene | Forward (5'→3') | Reverse (5'→3') |
| --- | --- | --- |
| Bax | TTGCTTCAGGGTTTCATCC | GCAAAGTAGAAGAGGGCAACC |
| Bcl-2 | GGGTGGGGTCATGTGTGTGG | CGGTTCAGGTACTCAGTCATCC |
| Caspase-3 | GCAAAGTGGAAGCGAATCAA | TTCTGTTGCCACCTTTCAGG |
| Caspase-9 | GGACACAGAAGTGAGGAGGA | GGGAGTTGTTGAGGAGGATG |
| P53 | CAGCACATGACGGAGGTTGT | TCATCCAAATACTCCACACGC |
